# Supplementary material for: Optimisation of Slurry-based Anaerobic Digestion for Enhanced Biogas Production and Sanitisation Leads to Microbial Community Tailoring
Source: Research Square preprint supplement (doi:10.21203/rs.3.rs-7432741/v1), 2025-09-10
Supplement: Supplementary file [file 37806368633c713c04842870.pdf]

**Additional file 2:** Average physicochemical data of mixed feedstock throughout trial

| TS %       | VS %      | tCOD g.L <sup>-1</sup> | sCOD g.L <sup>-1</sup> | NH <sub>3</sub> mg.L <sup>-1</sup> |
|------------|-----------|------------------------|------------------------|------------------------------------|
| 10.02±0.06 | 7.78±0.04 | 165.78±8.38            | 20.40±0.56             | 1013.2±65.7                        |
